# Supplementary material for: Simplified Criteria to Assess Long-Term Antiviral Treatment Indication in Chronic HBV-Infected Pregnant Women in Cambodia
Source: MDPI journal article supplement (doi:10.3390/v16020194), 2024-01-26
Supplement: s1 [file s1]

**Supplementary Table S1: Summary of adapted international guidelines**

| AASLD 2018                                                                                                                                                                                                                                                                                                                                                                                                                                                                                                                                                                                                                                                                                                                                                                                                                                                                                     |                          |                                                              |
|------------------------------------------------------------------------------------------------------------------------------------------------------------------------------------------------------------------------------------------------------------------------------------------------------------------------------------------------------------------------------------------------------------------------------------------------------------------------------------------------------------------------------------------------------------------------------------------------------------------------------------------------------------------------------------------------------------------------------------------------------------------------------------------------------------------------------------------------------------------------------------------------|--------------------------|--------------------------------------------------------------|
| ALT ULN: 25 IU/mL                                                                                                                                                                                                                                                                                                                                                                                                                                                                                                                                                                                                                                                                                                                                                                                                                                                                              | F2: NSP<br>F2 used: 7kPa | F4: NSP<br>F4 used: 11kPa                                    |
| <ul style="list-style-type: none"> <li>• If Ag HBe positive: <ul style="list-style-type: none"> <li>◦ ALT &gt; 2 x ULN &amp; HBV DNA <math>\geq 4.3 \log 10/\text{mL}</math></li> <li>◦ ALT = 1-2 ULN &amp; HBV DNA <math>\geq 4.3 \log 10/\text{mL}</math> &amp; fibrosis <math>\geq \text{F2}</math></li> </ul> </li> <li>• If AgHBe negative: <ul style="list-style-type: none"> <li>◦ ALT &gt; 2 x ULN &amp; HBV DNA <math>\geq 3.3 \log 10/\text{mL}</math></li> <li>◦ ALT = 1-2 ULN &amp; HBV DNA <math>\geq 3.3 \log 10/\text{mL}</math> &amp; fibrosis <math>\geq \text{F2}</math></li> </ul> </li> <li>• Compensated F4 &amp; HBV DNA <math>\leq 3.3 \log 10/\text{mL}</math></li> <li>• Decompensated F4</li> </ul>                                                                                                                                                                  |                          |                                                              |
| APASL 2015                                                                                                                                                                                                                                                                                                                                                                                                                                                                                                                                                                                                                                                                                                                                                                                                                                                                                     |                          |                                                              |
| ALT ULN : 40 IU/mL                                                                                                                                                                                                                                                                                                                                                                                                                                                                                                                                                                                                                                                                                                                                                                                                                                                                             | F2: 8kPa                 | F4: 11kPa                                                    |
| <ul style="list-style-type: none"> <li>• Compensated cirrhosis &amp; HBV DNA &gt; <math>3.3 \log 10/\text{mL}</math></li> <li>• Decompensated cirrhosis &amp; detectable HBV DNA</li> <li>• If AgHBe positive : <ul style="list-style-type: none"> <li>◦ &amp; HBV DNA &gt; <math>4.3 \log 10/\text{mL}</math> &amp; ALT &gt; 2 x ULN (1 month)</li> <li>◦ &amp; HBV DNA &gt; <math>4.3 \log 10/\text{mL}</math> &amp; LSM <math>\geq \text{F2}</math></li> </ul> </li> <li>• ALT &gt; ULN &amp; LSM <math>\geq \text{F2}</math></li> <li>• If AgHBe negative <ul style="list-style-type: none"> <li>◦ &amp; HBV DNA &gt; <math>3.3 \log 10/\text{mL}</math> &amp; ALT &gt; 2 x ULN (1 month)</li> <li>◦ &amp; HBV DNA &gt; <math>3.3 \log 10/\text{mL}</math> &amp; LSM <math>\geq \text{F2}</math></li> </ul> </li> <li>• Age &gt; 35 years &amp; LSM <math>\geq \text{F2}</math></li> </ul> |                          |                                                              |
| EASL 2017                                                                                                                                                                                                                                                                                                                                                                                                                                                                                                                                                                                                                                                                                                                                                                                                                                                                                      |                          |                                                              |
| ALT ULN : 40 IU/mL                                                                                                                                                                                                                                                                                                                                                                                                                                                                                                                                                                                                                                                                                                                                                                                                                                                                             | F2: 6 kPa                | F4: 12 kPa if ALT = ]ULN-5xULN[<br>or 9kPa if ALT $\leq$ ULN |
| <ul style="list-style-type: none"> <li>• Compensated or decompensated cirrhosis &amp; detectable HBV DNA</li> <li>• HBV DNA &gt; <math>4.3 \log 10/\text{mL}</math> &amp; ALT &gt; 2 x ULN</li> <li>• HBV DNA &gt; <math>3.3 \log 10/\text{mL}</math> &amp; moderate liver necro-inflammation or fibrosis</li> <li>• AgHBe positive &amp; high level of HBV DNA* &amp; age &gt; 30 years</li> </ul>                                                                                                                                                                                                                                                                                                                                                                                                                                                                                            |                          |                                                              |

ALT: Alanine Aminotransferase; AASLD: American Association for the Study of Liver Disease; APASL: Asian Pacific Association for the Study of the Liver; ASL: European Association for the Study of the Liver; F2 : significant liver fibrosis, F4 : cirrhosis, NSP : Non Specified in the guidelines ; ULN : Upper Limit of Normal, \* HBV DNA non specified in the guidelines, decision to use 20,000 as the threshold

**Supplementary Table S2. Performance of simplified algorithms to select women eligible for long-term antiviral treatment 6 months after delivery among women ineligible for TDF prophylaxis (n = 362)**

|            | TREAT-B          |          |    | Ta - Prohm          | WHO                 |
|------------|------------------|----------|----|---------------------|---------------------|
| Cut-off    | $\geq 2$         | $\geq 3$ | 4  | NA                  | NA                  |
| AASLD 2018 |                  |          |    |                     |                     |
| AUROC      | 0.79 (0.75-0.83) |          |    | 0.75<br>(0.70-0.79) | 0.68<br>(0.63-0.73) |
| TP         | 14               | 2        | /  | 14                  | 14                  |
| FP         | 48               | 9        | /  | 48                  | 94                  |
| TN         | 292              | 331      | /  | 292                 | 246                 |
| FN         | 8                | 20       | /  | 8                   | 8                   |
| Sen        | 63.6             | 9.1      | NA | 63.6                | 63.6                |
| Spe        | 85.9             | 97.4     | NA | 85.9                | 72.4                |
| EASL 2015  |                  |          |    |                     |                     |
| AUROC      | 0.54 (0.48-0.59) |          |    | 0.51 (0.46-0.56)    | 0.62 (0.57-0.67)    |
| TP         | 4                | 2        | /  | 4                   | 11                  |
| FP         | 58               | 9        | /  | 58                  | 97                  |
| TN         | 283              | 332      | /  | 283                 | 244                 |
| FN         | 17               | 19       | /  | 17                  | 10                  |
| Sen        | 19.1             | 9.5      | NA | 19.1                | 52.4                |
| Spe        | 83.0             | 97.4     | NA | 83.0                | 71.6                |

Abbreviations: AASLD : American Association for the Study of Liver Disease; AUROC : Area Under the Receiver Operating Characteristic; EASL : European Association for the Study of the Liver; FN : False Negative; FP : False Positive; Sen : Sensitivity; Spe : Specificity; TN : True Negative, TP : True Positive
